# **Evidence that poor HAART adherence has a great impact on HIV/AIDS treatment failure more than severity of illness and opportunity of infection in Ethiopia: Systematic review and meta-analysis**

Aklilu Endalamaw<sup>1\*</sup>, Mengistu Mekonen<sup>1</sup>, Demeke Geremew<sup>2</sup>, Fekadu Ambaw<sup>3</sup>, Hiwot Tesera<sup>4</sup>, Tesfa Dejenie Habtewold<sup>5</sup>

<sup>1</sup>Department of Pediatrics and Child Health Nursing, School of Nursing, College of Medicine and Health Sciences, University of Gondar, Gondar, Ethiopia

<sup>2</sup>Department of Immunology, School of Biomedical and Laboratory Sciences, College of Medicine and Health Sciences, University of Gondar, Gondar, Ethiopia

<sup>3</sup>Department of comprehensive nursing, School of Nursing, College of Medicine and Health Sciences, University of Gondar, Gondar, Ethiopia

<sup>4</sup>Department of Microbiology, Bahirdar University, Bahirdar, Ethiopia

<sup>5</sup>University of Groningen, University Medical Center Groningen, Department of Epidemiology, Groningen, The Netherlands

\* Corresponding author: Aklilu Endalamaw; Email: [yaklilu12@gmail.com](mailto:yaklilu12@gmail.com); [P.O.Box=196](mailto:P.O.Box=196)

## ABSTRACT

**Background:** The pooled burden of HIV treatment failure and its associated factors in Ethiopian context is required to provide evidence towards renewed ambitious future goal.

**Methods:** PubMed, Web of Science, Scopus, Google Scholar, and Ethiopian Universities' (University of Gondar and Addis Ababa University) online repository library were used to get the research articles. I-squared statistics was used to see heterogeneity. Publication bias was checked by Egger's regression test. A meta-analysis using the DerSimonian-Laird random-effects model was employed to estimate the overall prevalence of treatment failure. Subgroup analyses based on the geographical location of the study, age of study population, type of treatment failure, and study design were conducted to see variation in outcomes. The sensitivity analysis was also employed to see whether an outlier result found in the included studies.

**Results:** Overall HIV treatment failure found to be 15.9% (95% CI: 11.6%-20.1%). HIV treatment failure was 10.2% (6.9%-13.6%) using immunological definition, 5.6% (95% CI: 2.9%-8.3%) using virological definition, and 6.3% (4.6%-8.0%) using clinical definition. Poor HAART adherence (AOR= 8.5; 95% CI: 4.1-12.8), severity of illness (as measured by WHO clinical stage III/IV (AOR=1.9; 95% CI: 1.3-2.6), and presence of opportunistic infections (AOR=1.8; 95% CI: 1.2-2.4) were significantly associated with HIV treatment failure.

**Conclusions:** HIV treatment failure in Ethiopia found to be high and differed by adherence level, severity of illness, and presence of opportunistic infection. HIV

intervention programs, such as behavioral intervention is required to sustain HIV treatment adherence and improve treatment success as a result.

**Protocol Registration:** It has been registered in the PROSPERO database ([CRD42018100254](https://doi.org/10.1101/440743)).

**Keywords:** HAART; HIV; Failure; Treatment; Ethiopia

## BACKGROUND

The risk of death due to HIV has been decreased after the era of highly active antiretroviral therapy (HAART) (1). Evidence has shown that individuals on HAART with an undetectable viral load, absence of an advanced clinical finding, and high CD4 count are less likely to transmit HIV to others people (2, 3). However, the risk of HIV transmission is high due to treatment failure. Treatment failure can be a virological, immunological, or clinical failure. Virological failure is conceded when plasma viral load above 1000 copies/ml based on two consecutive viral load measurements after three months with adherence support. Immunological failure is confirmed when CD4 count falls to the baseline (or below) or persistent CD4 levels below 100 cells/mm<sup>3</sup> for adults and adolescents or below 200 cells/mm<sup>3</sup> for children younger than five years. Clinical failure is defined as an occurrence or recurrence of advanced World Health Organization (WHO) clinical stage or conditions after at least 6 months of therapy (4).

Globally, United Nations Programme on HIV/AIDS (UNAIDS) 90-90-90 planned to have 90% of people on HAART are virally suppressed by 2030 and as a result, HIV treatment failure would be prevented (5). Despite this ambitious goal, as of a systematic analysis of national HIV treatment cascades of 69 countries by 2016, viral suppression was

between 7% in China and 68% in Switzerland (6). It can be prevented through the implementation of globally recommended strategies, such as increase HAART adherence, taking medication based on the appropriate prescription, prevent drug-drug interaction, increasing knowledge and attitudes of patients towards HAART, timely initiation of HAART, prevention and control of opportunistic infections, and implementation of effective food and nutrition policy (7-11).

HIV treatment failure is becoming a threat of different African countries: Burkina Faso (6.4%) (12), Ghana (15.7%) (13), and Tanzania (14.9%) (14). In Ethiopia, there is wide variation of reports and nationally representative pooled data on virological, immunological, and clinical failure is lacking. In order to provide evidence towards renewed ambitious future goal, it is now critical to reflect the pooled burden of HIV treatment failure in the Ethiopian context. The objective of this study was (1) to estimate the national burden of HIV treatment failure, (2) to perform meta-analysis on three key influencing factors (i.e. poor adherence, CD4 cell count, severity of illness (WHO clinical stage and presence of opportunistic infections) of HIV treatment failure, and (3) review contextual factors of HIV treatment failure using globally accepted key performance indicators as a framework when sufficient number of studies are available for meta-analysis. Thus, this information will be helpful for healthcare professionals and further helps to enable the country to sustain treatment successes and achieve the goal of ending AIDS.

## **METHODS**

### **Reporting**

It is reported based on the Preferred Reporting Items for Systematic Reviews and Meta-analyses (PRISMA) guideline ([15](#)) (Additional file-Research checklist). Its protocol is registered in the PROSPERO database with a registration number [CRD42018100254](#).

## **Search strategy**

PubMed, Web of Science, Scopus, and Google Scholar databases were used to get the research articles. The search strategy made in PubMed was: [("Human Immunodeficiency virus"[MeSH Terms] OR HIV OR AIDS OR "Acquired Immunodeficiency syndrome" AND ("antiretroviral therapy"[MeSH Terms] OR "highly antiretroviral therapy" OR HAART OR ART OR "ARV Therapy" OR "antiretroviral therapy") AND (outcome OR "treatment failure" OR failure OR "virological failure" OR "immunological failure" OR "Clinical failure") AND (Ethiopia)]. The PubMed search was done on 03/10/2018. In addition, Ethiopian Universities' (University of Gondar and Addis Ababa University) online repository library were searched. Endnote 7 reference manager software (Developer: Clarivate Analytics, website: endnote.com) was used to manage duplicated references and for citation in the text.

## **Inclusion and exclusion criteria**

Those articles included in this meta-analysis were: (1) cohort, case-control, and cross-sectional studies, (2) studies that reported the prevalence and/or AOR (adjusted odds ratio) of associated factors of immunological, clinical, virological and overall HAART treatment failure, (3) studies conducted in Ethiopia, and (4) studies published in English.

Studies without full-text access, qualitative studies, and conference proceeding without full-text report were excluded.

## **Outcome measurement**

According to WHO (4), HIV treatment failure could be a clinical, immunological, and virological failure.

The prevalence of treatment failure was ascertained by dividing the participants with the outcome of interests to the overall study participants and multiplied by 100.

## **Quality assessment**

Two authors assessed the quality of the articles based on the Newcastle-Ottawa Scale (NOS) quality assessment tool for cross-sectional, case-control, and cohort studies (16).

The criteria for cross-sectional studies have three sections, in which the first section mainly focused on selection and graded by four stars, the second section dedicated with the comparability of the study and graded by two stars, and the third section emphasized on the outcome and graded by three stars. The NOS quality criteria for case-control studies were: 1) selection evaluated by four stars, 2) comparability assessed by two stars, and 3) exposure graded by four stars. The NOS criteria for cohort studies were: 1) selection graded by six stars, 2) comparability graded by two stars, and 3) outcome graded by five stars. Whenever disagreement happened between the two quality assessors, the procedure would be repeated and further solved by an interference of the third reviewer. Cross-sectional, case-control, and cohort studies scored  $\geq 6$ ,  $\geq 7$ , and  $\geq 9$  of the quality assessment criteria were included respectively.

## **Data extraction process**

Two authors independently extracted the following data: first author and year of publication, sample size, an outcome of interest (treatment failure), study design, study population, geographical location of the study, source of funding, and response rate.

## **Data synthesis and statistical analysis**

STATA 14 statistical software (Stata Corp, College Station, TX, USA) was used for meta-analysis. Publication bias assessed by funnel plot and more objectively by Egger's regression test. I-squared statistics was used to check the heterogeneity of the studies. Meta-analysis using the DerSimonian-Laird random-effects model was employed to estimate the overall prevalence of treatment failure. Whenever meta-analysis on associated factors was not possible due to lack of available studies, qualitative synthesis was done. Subgroup analysis based on the geographical location of the study, treatment failure type, age of study population, and study design was conducted to see variation in outcomes. The sensitivity analysis was also employed to see whether an outlier result found in the included studies.

## **RESULTS**

### ***Search results***

A total of 873 articles were found from PubMed (n=187), Web of Science (n=21), Scopus (n=13), Google Scholar (n=134), and Ethiopian Universities' online repository library (University of Gondar and Addis Ababa University) (n=33). A total of 331 articles have remained after duplicate studies were removed. Then, 302 articles were removed based on the unmatched title and abstracts. Finally, 18 articles were retained for review and meta-analysis (Figure 1).

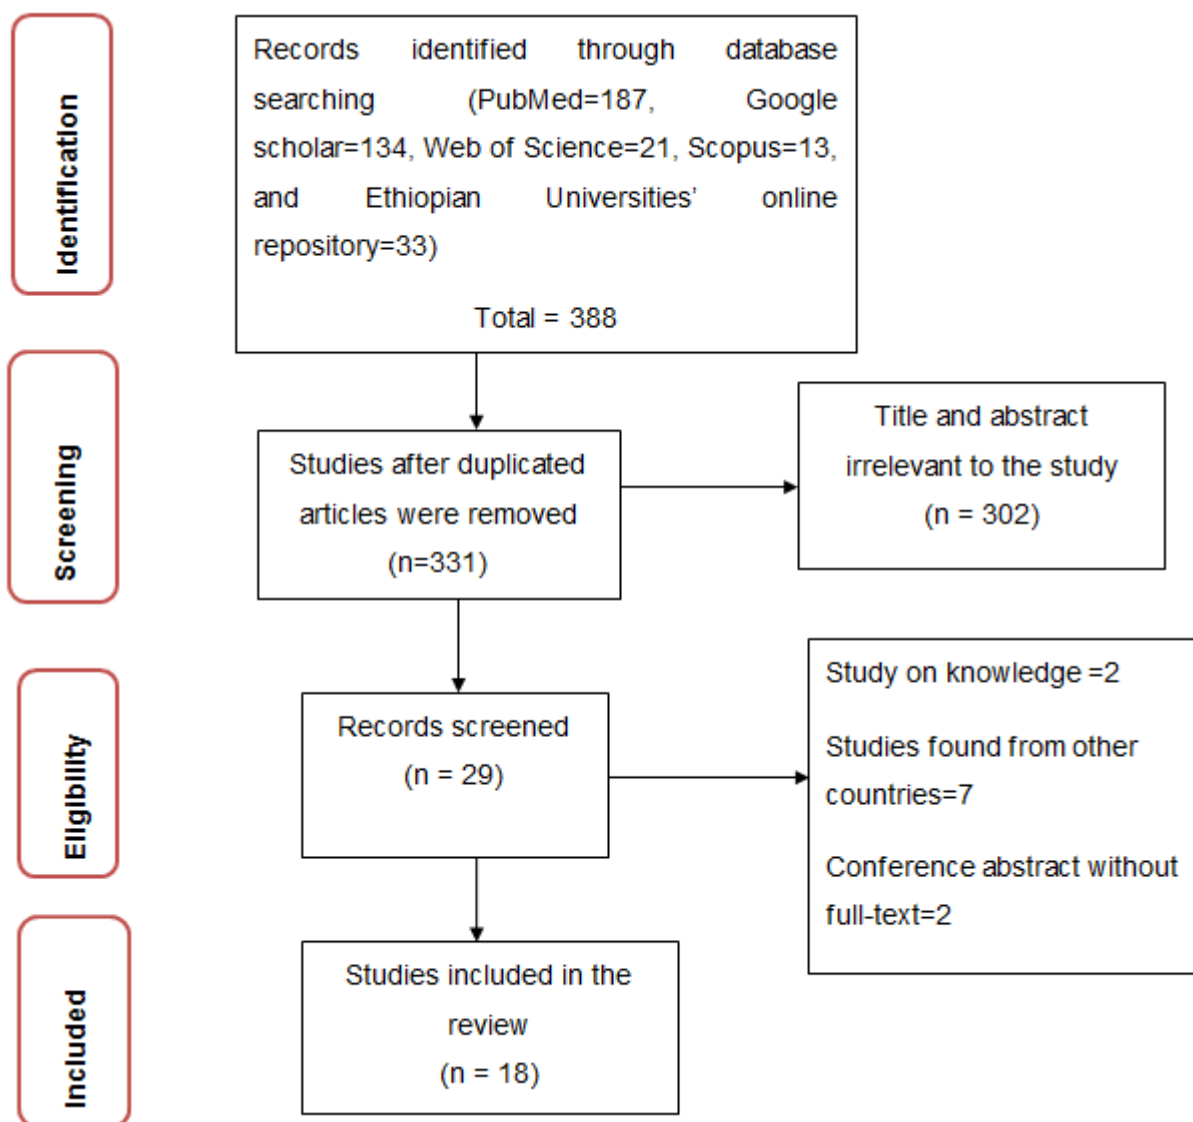

Figure 1: PRISMA flow-chart diagram describing the selection of studies

### ***Characteristics of included studies***

All studies were conducted between 2005 and 2016. Eight of the studies were conducted in Amhara region ([17-24](#)), whereas five in Addis Ababa ([25-29](#)), three in Oromia ([30-32](#)), one in Tigray ([33](#)), and one in Southern Nations, Nationalities, and Peoples' Region (SNNPR) ([34](#)). Three studies were done by case-control study design ([23](#), [24](#), [29](#)), four studies by cross-sectional ([17-19](#), [33](#)), and 11 by cohort study design



([20-22](#), [25-28](#), [30-32](#), [34](#)). Ten studies were done on adult population ([19](#), [21-26](#), [28](#), [29](#), [31](#)), six on children ([18](#), [20](#), [27](#), [30](#), [32](#), [34](#)), and two on all age group ([17](#), [33](#)) (Table 1).

Table 1: Characteristic of included studies in systematic review and meta-analysis

| First Author/Year                                | Study period | Region      | Study design         | Study population | Sample size | Response rate | Source of fund                                            |
|--------------------------------------------------|--------------|-------------|----------------------|------------------|-------------|---------------|-----------------------------------------------------------|
| Teshome W/2015 ( <a href="#">28</a> )            | 2007-2009    | Addis Ababa | Retrospective cohort | Adult            | 293         | 100%          | Not reported                                              |
| Bokretsiion BG et al/2017 ( <a href="#">23</a> ) | 2016         | Amhara      | Cross-sectional      | All age group    | 421         | 100%          | Bahirdar University and Ethiopian public health institute |
| Yassin S/2017 ( <a href="#">20</a> )             | 2006-2015    | Oromia      | Retrospective cohort | children         | 269         | 86.8%         | Not reported                                              |
| Zelege A/2016 ( <a href="#">24</a> )             | 2005-2013    | Amhara      | Retrospective cohort | children         | 225         | 100%          | Not reported                                              |
| Yimer YT/2015 ( <a href="#">15</a> )             | 2009-2013    | Addis Ababa | Retrospective cohort | Adult            | 525         | 100%          | Not reported                                              |
| Bacha T et al/2012 ( <a href="#">29</a> )        | 2005-2011    | Addis Ababa | Retrospective cohort | children         | 1,186       | 100%          | Not reported                                              |
| Ayalew MB et al/2016 ( <a href="#">25</a> )      | 2011-2015    | Amhara      | Retrospective study  | Adult            | 340         | 100%          | University of Gondar, Ethiopia                            |
| Sisay MM et al/2018 ( <a href="#">17</a> )       | 2010-2016    | Amhara      | Retrospective cohort | children         | 824         | 81.9%         | University of Gondar, Ethiopia                            |
| Tsegaye AT et al/2016                            | 2006-2014    | Amhara      | Retrospective cohort | Adult            | 356         | 100%          | University of Gondar, Ethiopia                            |

---

|                              |            |             |                      |               |     |      |                                                  |  |
|------------------------------|------------|-------------|----------------------|---------------|-----|------|--------------------------------------------------|--|
| (19)                         |            |             |                      |               |     |      |                                                  |  |
| Hailu GG et al/2017 (16)     | 2008-2016  | Tigray      | Cross-sectional      | All age group | 260 | 100% | Mekelle Univesity, Ethiopia                      |  |
| Yayehirad AM et al/2013 (18) | 2007-2008  | Amhara      | Retrospective cohort | Adult         | 509 | 100% | University of Gondar, Ethiopi                    |  |
| Abdissa A et al/2014 (32)    | 2010-2012  | Oromia      | Prospective cohort   | Adult         | 265 | 100% | Danish International Development Agency (DANIDA) |  |
| Tadesse BT et al /2017 (34)  | 2015 -2016 | SNNPR       | cohort               | children      | 628 | 100% | Hawassa University, Ethiopia                     |  |
| Workneh N et al/2009 (33)    | 2005-2008  | Oromia      | Retrospective cohort | children      | 96  | 100% | Jimma University, Ethiopia                       |  |
| Sisay C et al/2017 (30)      | 2011-2016  | Addis Ababa | Retrospective cohort | Adult         | 595 | 100% | Ethiopian publi health institute                 |  |
| Babo YD et al/2017 (26)      | 2014       | Amhara      | Case-control         | Adult         | 304 | 100% | USAID                                            |  |
| Bayu B et al/2017 (27)       | 2015       | Amhara      | Case-control         | Adult         | 306 | 100% | Not reported                                     |  |
| Getnet Y /2014 (31)          | 2005-2011  | Addis Ababa | Case-control         | Adult         | 309 | 100% | Jimma University, Ethiopia                       |  |

---

**Publication bias**

Funnel plot for HIV treatment failure is shown below (Figure 2). Egger's regression test of the p-value for overall HIV treatment failure was 0.23. Both methods showed that there was no significant publication bias.

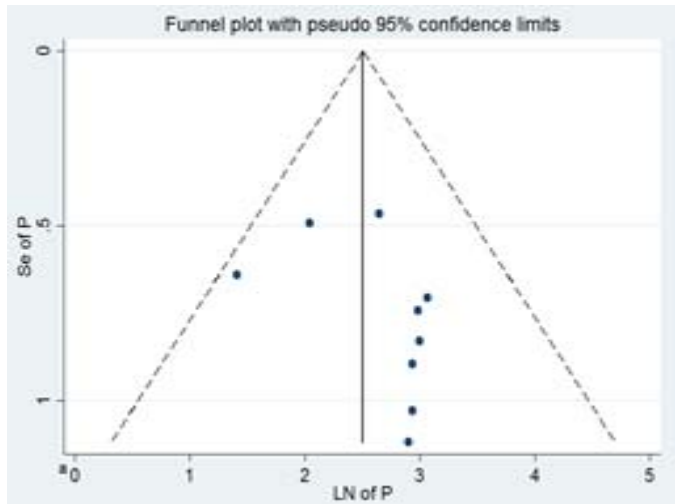

Figure 2: Funnel plot, in which the vertical line indicates the effect size whereas the diagonal line indicates the precision of individual studies with 95% confidence limit

## Meta-analysis

### ***HAART treatment failure***

A total of 4,738 participants in nine studies were used to estimate the pooled prevalence of HIV treatment failure based on the definition of HAART failure. The pooled prevalence of HIV treatment failure was 15.9% (95% CI: 11.6%-20.1%) (Figure 3).

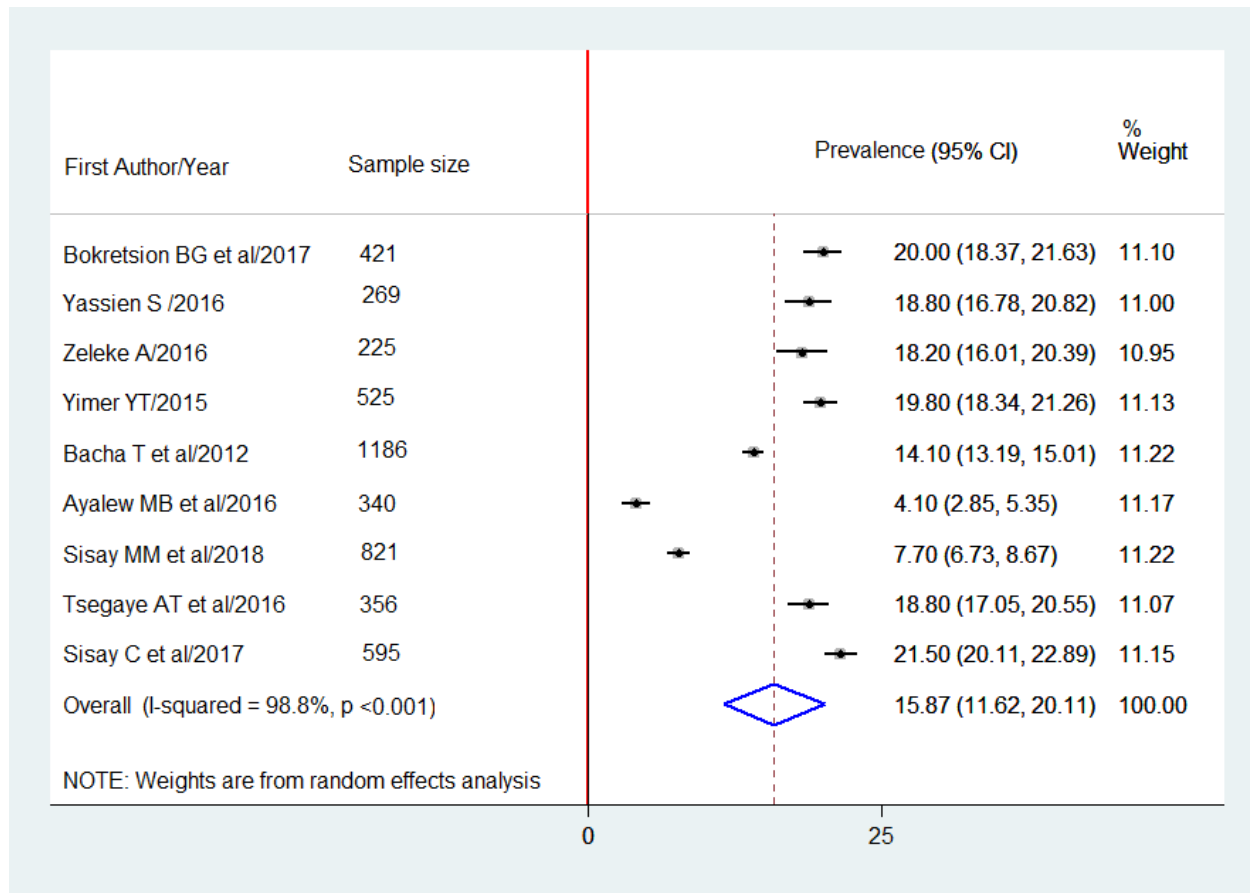

Figure 3: Forest plot of the prevalence of HAART failure in Ethiopia and its 95%CI, the midpoint of each line illustrates the prevalence rate estimated in each study. The diamond shows pooled prevalence.

### ***Immunological and Virological failure***

A total of 5,899 study participants in 13 studies were involved to determine HIV treatment failure based on the immunological definition. Of which, 10.2% (6.9%-13.6%) developed immunological failure. Regarding virological failure, the pooled prevalence from six studies with a total of 2,406 participants was 5.6% (95% CI: 2.9%-8.3%) (Figure 4).

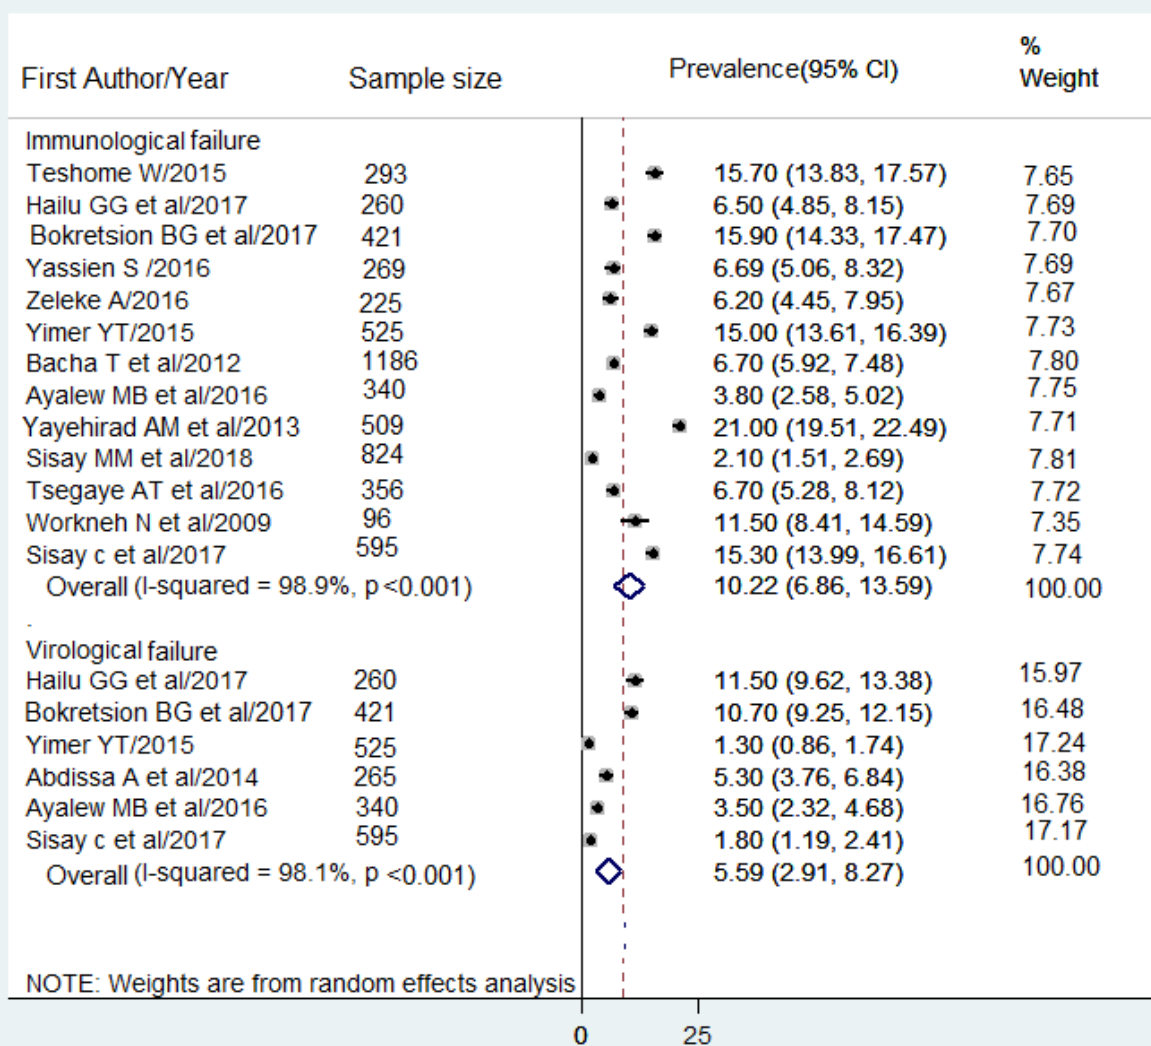

Figure 4: Forest plot of the prevalence of immunological and virological failure in Ethiopia and its 95%CI, the midpoint of each line illustrates the prevalence rate estimated in each study. The diamond shows pooled prevalence.

### **Clinical failure**

A total of 4,497 study participants in nine studies found to estimate the clinical failure, in which the pooled prevalence was 6.3% (4.6%-8.0%) (Figure 5).

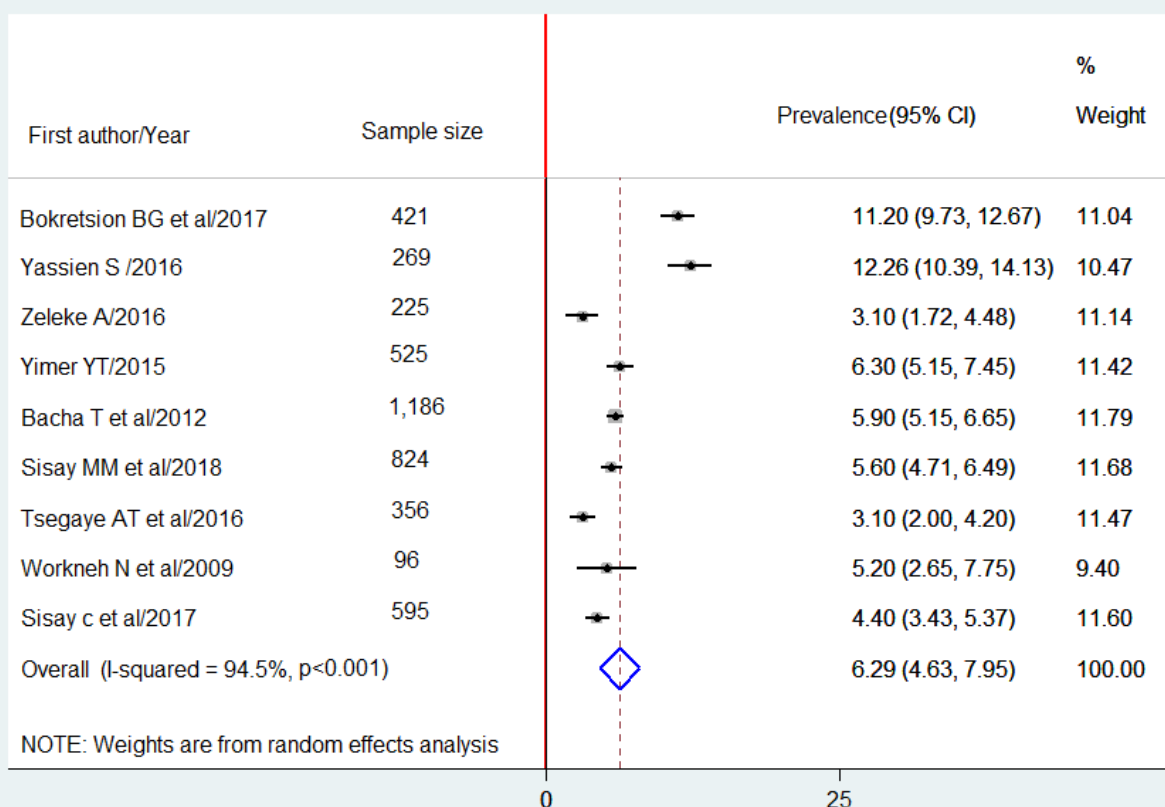

Figure 5: Forest plot of the prevalence of clinical failure in Ethiopia and its 95%CI, the midpoint of each line illustrates the prevalence rate estimated in each study. The diamond shows pooled prevalence.

### **Subgroup analysis**

Subgroup analysis was employed based on region, age of the study participants, and study design. Prevalence of HIV treatment failure based on the definition of HAART, immunological, and virological failure is found in Amhara (13.7%), Tigray (6.5%), and Addis Ababa (1.5%) respectively. In adult population, prevalence of HIV treatment failure was 16.0% based on the definition of HAART, 12.9% immunological, 2.8% virological, and 4.6% clinical failure. In children, prevalence of HIV treatment failure was

is 14.6% based on the definition of HAART, 6.4% immunological, and 6.4% clinical failure (Table 2).

Table 2: Subgroup analysis of the prevalence (p) of HIV treatment failure based on overall HAART, immunological, virological, and clinical definition by region, age, and study design in Ethiopia

| Subgroup analysis             | Overall HAART failure P (95%CI) | Immunological failure P (95%CI) | Virological failure P (95%CI) | Clinical failure P (95% CI) |
|-------------------------------|---------------------------------|---------------------------------|-------------------------------|-----------------------------|
| <b>By Region</b>              |                                 |                                 |                               |                             |
| Amhara                        | 13.7 (7.3-20.2)                 | 9.3 (3.3-15.2)                  | 7.1 (0.03-14.1)               | 5.7 (2.6-8.9)               |
| Oromia                        | 18.8 (16.8-20.8)                | 8.9 (4.2-13.6)                  | 5.3 (3.8-6.8)                 | 8.8 (1.9-15.7)              |
| Addis Ababa                   | 18.4 (13.6-23.3)                | 13.2 (7.9-18.4)                 | 1.5 (1.0-2.0)                 | 5.5 (4.4-6.6)               |
| Tigray                        | —                               | 6.5 (4.9-8.2)                   | 11.5 (9.6-13.4)               | —                           |
| <b>By age of participants</b> |                                 |                                 |                               |                             |
| All age group                 | 20.0 (18.4-21.6)                | 11.2 (2.0-20.4)                 | 11.0 (9.9-12.2)               | 11.2 (9.7-12.7)             |
| Adult                         | 16.0 (7.4-24.7)                 | 12.9 (7.6-18.3)                 | 2.8 (1.5-4.1)                 | 4.6 (2.9-6.3)               |
| Children                      | 14.6 (9.7-19.6)                 | 6.4 (3.6-9.3)                   | —                             | 6.4 (4.2-8.5)               |
| <b>By Study design</b>        |                                 |                                 |                               |                             |
| Cross-sectional               | 14.1 (3.0-25.2)                 | 8.1 (2.7-13.5)                  | 8.5 (3.2-13.9)                | 7.2 (0.8-15.8)              |
| Cohort                        | 16.8 (12.2-21.37)               | 11.2 (6.8-15.6)                 | 2.6 (1.1-4.0)                 | 6.0 (4.5-7.5)               |
| <b>Combined</b>               | 15.8 (11.6-20.1)                | 10.2 (6.9-13.6)                 | 5.6 (2.9-8.3)                 | 6.3 (4.6-8.0)               |

— denotes no estimation due to lack of original studies

### **Sensitivity Analysis**

In the sensitivity analysis, the overall HIV treatment failure based on the definition of HAART failure was observed high (17.3%) and low (15.2%) when *Ayalew MB et al 2016* (19) and *Sisay C et al/2017*(28) was omitted respectively. The minimum (9.3%) and maximum (10.8%) pooled prevalence of HIV treatment failure based on immunological

definition were observed when *Yayehirad AM et al/2013* (22) and *Ayalew MB et al/2016* (19) was omitted respectively. The pooled prevalence of HIV treatment failure based on the virological definition was 4.4% when *Hailu GG et al /2015* (33) omitted and 6.5% when *Yimer YT/2015* (26) left from the analysis. Regarding the clinical definition of HIV treatment failure, the minimum (5.5%) pooled prevalence was observed when *Yassin S /2016* omitted (30).

Table 3: The prevalence (p) of HIV treatment failure based on HAART failure, immunological, virological, and clinical definition when the study omitted in Ethiopia

| Study omitted            | HAART failure<br>P (95%CI) | Immunological<br>failure<br>P (95%CI) | Virological<br>failure<br>P (95%CI) | Clinical failure<br>P (95% CI) |
|--------------------------|----------------------------|---------------------------------------|-------------------------------------|--------------------------------|
| Bokretsion BG et al/2017 | 15.3 (10.8-19.9)           | 9.7 (6.3-13.2)                        | 4.5 (2.3-6.7)                       | 5.6 (4.2-7.1)                  |
| Yassin S /2017           | 15.5 (10.9-20.1)           | 10.5 (6.9-14.1)                       | —                                   | 5.5 (4.1-7.1)                  |
| Zelege A/2016            | 15.6 (11.0-20.2)           | 10.6 (7.0-14.1)                       | —                                   | 6.7 (4.9-8.4)                  |
| Yimer YT/2015            | 15.4 (10.8-19.9)           | 9.8 (6.4-13.3)                        | 6.5 (2.7-10.3)                      | 6.3 (4.4-8.2)                  |
| Bacha T et al/2012       | 16.1 (10.9-21.3)           | 10.5 (6.6-14.4)                       | —                                   | 6.4 (4.3-8.4)                  |
| Ayalew MB et al/2016     | 17.3 (13.5-21.2)           | 10.8 (7.1-14.4)                       | 6.0 (2.9-9.2)                       | —                              |
| Sisay MM et al/2018      | 16.9 (12.6-21.2)           | 10.9 (7.7-14.1)                       | —                                   | 6.4 (4.4-8.4)                  |
| Tsegaye AT et al/2016    | 15.5 (10.9-20.1)           | 10.5 (6.9-14.1)                       | —                                   | 6.7 (5.0-8.4)                  |
| Teshome W/2015           | —                          | 9.8 (6.3-13.2)                        | —                                   | —                              |
| Hailu GG et al/2015      | —                          | 10.5 (6.9-14.1)                       | 4.4 (2.0-6.9)                       | —                              |
| Yayehirad AM et al/2013  | —                          | 9.3 (6.3-12.4)                        | —                                   | —                              |
| Workneh N et al/2009     | —                          | 10.1 (6.6-13.6)                       | —                                   | 6.4 (4.6-8.2)                  |
| Sisay C et al/2017       | 15.2 (10.8-19.5)           | 9.8 (6.4-13.2)                        | 6.4 (2.4-10.4)                      | 6.5 (4.7-8.4)                  |
| Abdissa A et al/2014     | —                          | —                                     | 5.6 (2.7-8.6)                       | —                              |



|          |                  |                 |               |               |
|----------|------------------|-----------------|---------------|---------------|
| Combined | 15.8 (11.6-20.1) | 10.2 (6.8-13.6) | 5.6 (2.9-8.3) | 6.3 (4.6-7.9) |
|----------|------------------|-----------------|---------------|---------------|

— denotes no estimation due to lack of original studies

## Associated factors of HIV treatment failure

HIV treatment failure is attributed to various behavioral, drug, and clinical-related associated factors.

### Behavioral and drug-related factors

The pooled effect of poor HAART adherence on HIV treatment failure was found to be 8.5 (95% CI: 4.1-12.8) (Figure 6).

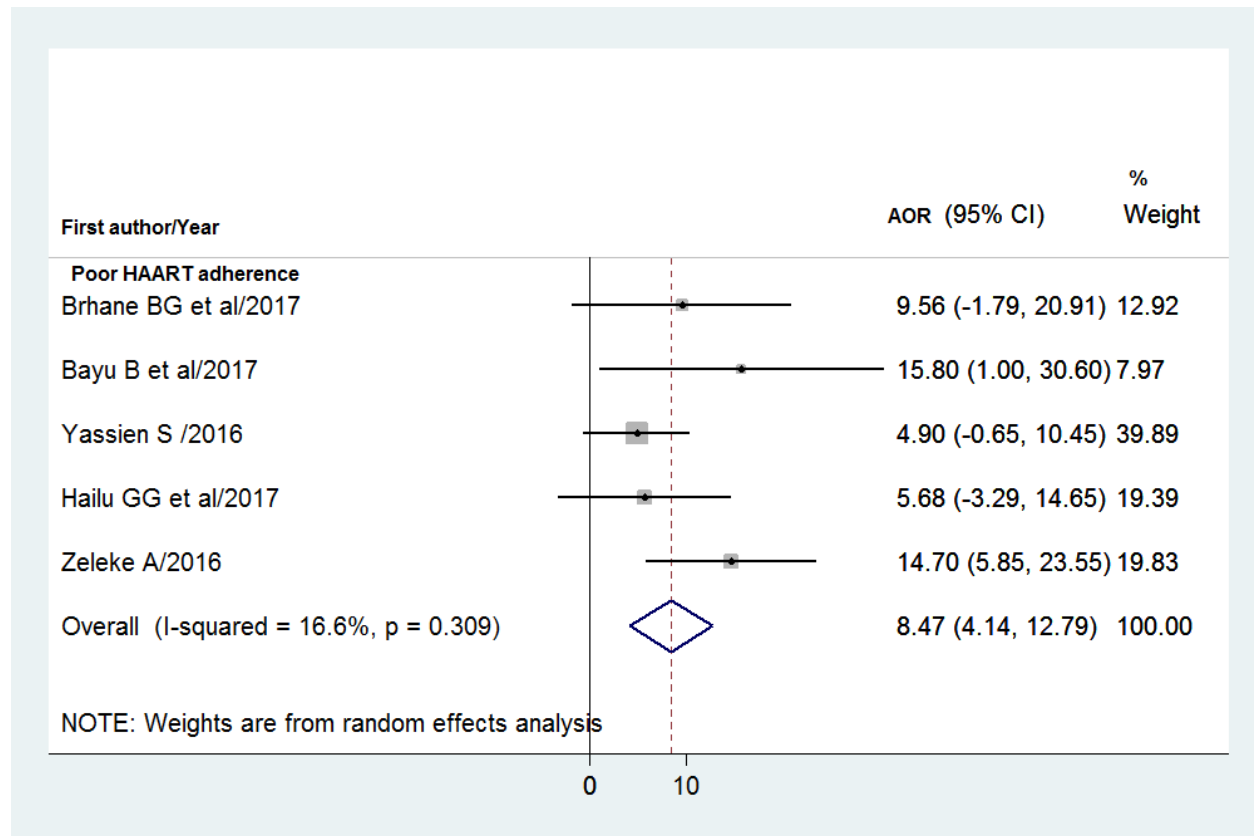

Figure 6: Forest plot of the adjusted odds ratios with corresponding 95% CIs of studies on the association of poor HAART adherence and HIV treatment failure

Another study (17) showed that lack of consultation significantly associated with HIV treatment failure (AOR=4.9,95% CI:1.5-15.8). Regarding drug-related factors, stavudine based regimen (AOR = 3.5; 95% CI: 1.3-10.6) (23), ART drug substitution (AHR=1.7; 95% CI:1.1-2.7) (27), substitution of original regimen (AOR=3.3; 95% CI=1.6-6.7) (18), absence of PMTCT prophylaxis (AOR=1.4; 95% CI: 1.2-2.5) (18), and using faith healing medicine (AOR=8.1, 95% CI: 3.1-21.5) (17) were reported significant predictors of HIV treatment failure.

### ***Clinical-related factors***

The pooled effects of low CD4 cell count was 7.2 (95% CI: 2.5-12.0) when <200 cells/mm<sup>3</sup>, 2.1 (95% CI: 1.4-2.8) when ≤ 100 cells/ mm<sup>3</sup>, and 3.3 (95% CI: 1.4-5.3) when <50 cells/mm<sup>3</sup> (Figure 7).

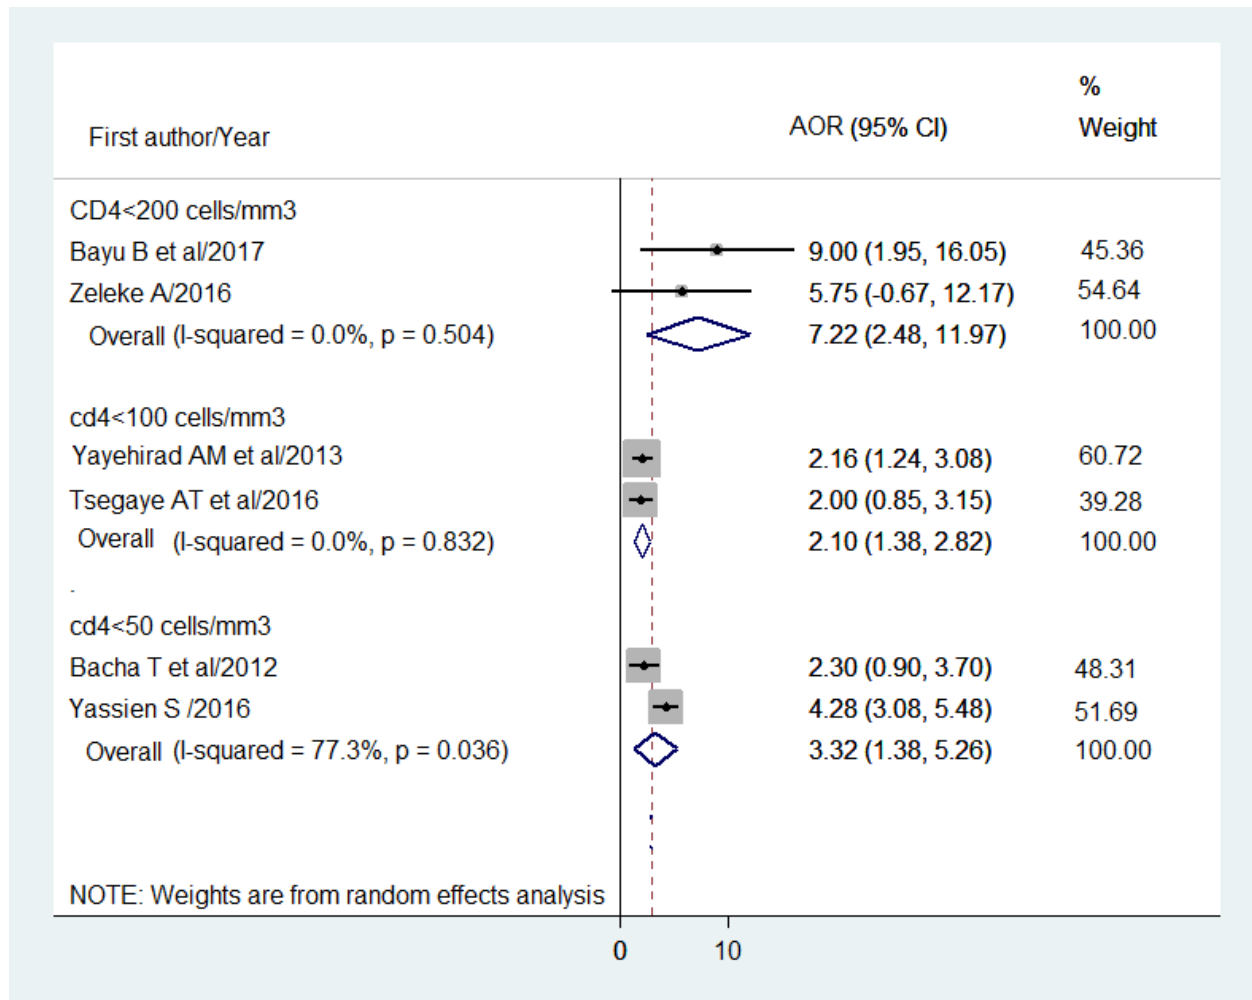

Figure 7: Forest plot of the adjusted odds ratios (AOR) with corresponding 95% CI of studies on the association of CD4 cells and HIV treatment failure

The pooled effect of severity of illness (i.e. being on WHO clinical stage III/IV) on HIV treatment failure was 1.9 (95% CI: 1.3-2.6) compared with stage II/I. The pooled effect of presence of opportunistic infections was 1.8 (95% CI: 1.2-2.4) (Figure 8).

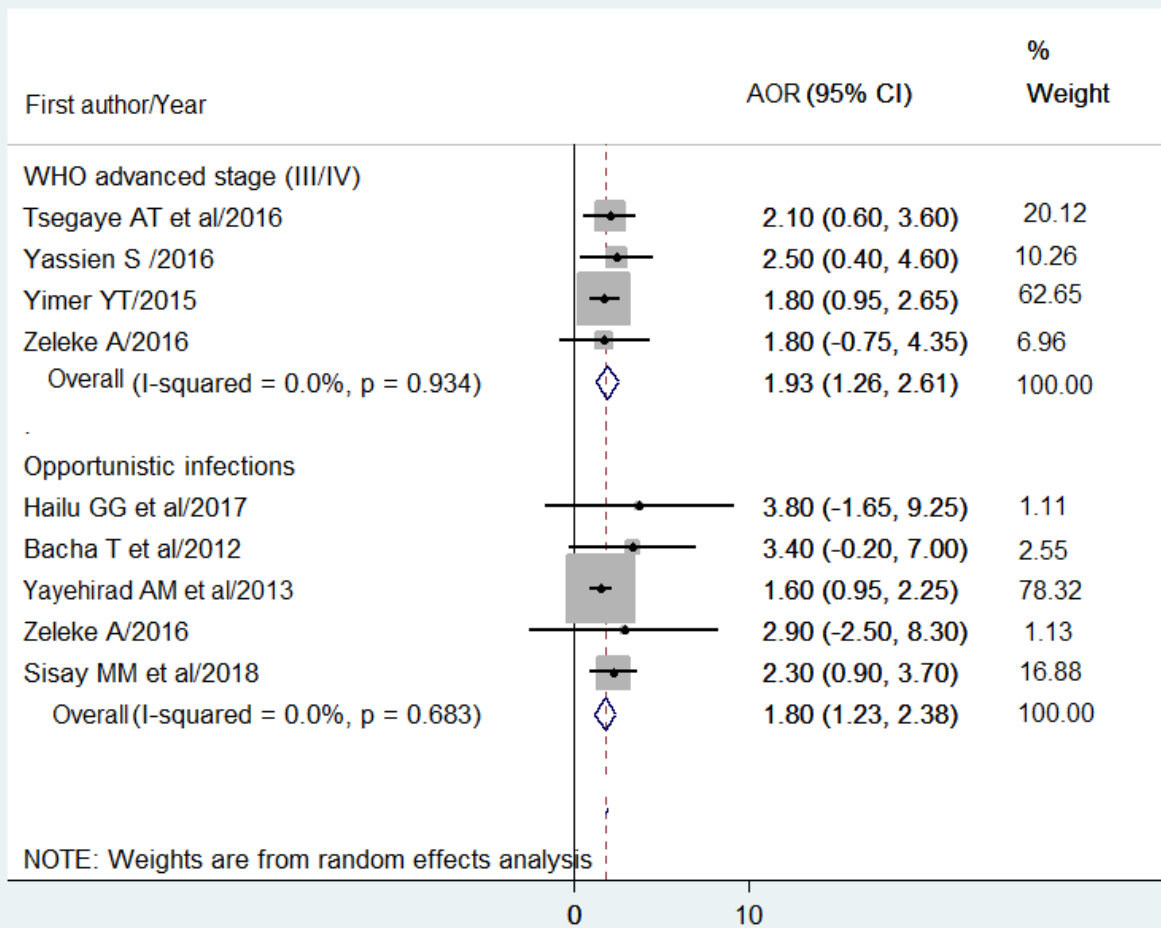

Figure 8: Forest plot of the adjusted odds ratios (AOR) with corresponding 95% CIs of studies on the association of WHO clinical stage, opportunistic infections, and HIV treatment failure

Previous studies also showed that lower baseline body mass index (BMI) (AOR = 2.8; 95% CI: 1.01-7.5) ([23](#)), low height for age (AHR= 3.3; 95% CI: 1.0-10.6) ([27](#)), increased weight (AHR=0.9, 95% CI: 0.9-0.9) ([21](#)), and low weight at baseline (AHR=0.58, 95% CI:0.38-0.89) ([26](#)) were significantly associated with HIV treatment failure. Further, studies showed that ambulatory patients (AOR=2.9, 95%CI: 1.2-7.5) ([22](#)) and children

who did not know their HIV status (AHR=4.4, 95% CI: 1.8-11.3) (20) had high risk for HIV treatment failure compared with their counterparts.

## DISCUSSION

To our knowledge this first meta-analysis study to report the national prevalence of HIV treatment failure and its important risk factors. The prevalence of HAART failure was 15.9% whereby immunological failure was 10.2%, clinical failure was 6.3%, and virological failure was 5.6%. We found that poor HAART adherence, low CD4 cell count, severity of illness (WHO clinical stage III/IV) and presence of opportunistic infections were key significantly associated factors of treatment failure.

In this study, we uncovered that HIV treatment failure was 15.9% (95% CI: 11.6%-20.1%) using the definition of HAART failure. In Ethiopia, HIV treatment failure is becoming increased and appointed discussion. This might be due to implementation of poor HIV care, delaying on recognition of symptom of treatment failure, (35), late initiation of HAART (36), high burden of opportunistic infections (37), lack of well nutritional support (38), ART-associated adverse reaction (39), and frequent psychological problem (40, 41). Besides, the absence of frequent therapeutic drug monitors and/ or resistance testing while the patient is still on the suspect or failing regimen. All four markers of lower socioeconomic status (financial hardship, non-employment, rented or unstable housing status, and non-university education) can be considered for a higher burden of HIV treatment failure in Ethiopia. These evidence implicates ART should be switched only after considering supplementary treatment failure prevention activities. In resource-limited setting, it is recommended to keep

patients longer on first-line ART regimen which preserves the more toxic and expensive second-line ART regimen.

This meta-analysis finding showed that HIV treatment failure using the immunological definition (10.2%) was higher than clinical (6.3%) and virological (5.6%) failure. The variations might be due to the difference in number of studies included to the pooled analysis. Given that the WHO immunological criteria have a very low sensitivity and high specificity (42), false positive finding may be evident in primary studies. The lower prevalence of HIV treatment failure using clinical definition might be due to limited diagnostic capabilities. It might be difficult to identify treatment failure in patients under clinical monitoring since not all HIV care clinic sites had a systematic approach and well-trained health professionals to collect data on opportunistic infections. Using viral load based HIV treatment failure could provide better prognostic information about the risk of developing active AIDS stage which will promote more effective second-line ART. However, in most Ethiopian health institutions, virological ART failure is likely to be under-diagnosed in the routine health system and might be under reported compared with clinical and/or immunological failure as a result. Additionally, only five studies were used to estimate virological failure that might result in under-estimation.

Based on the subgroup analysis, HIV treatment failure is lower in children. This may be due to the fact that ART monitoring using clinical and immunological criteria is problematic in children, and misclassification rates using the WHO pediatric guidelines remain high (42).

In agreement with previous studies (43, 44), we found low CD4 cell count, advanced WHO clinical stage, and presence of opportunistic infections leads to HIV treatment

failure. Despite this fact, these risk factors are highly interconnected. CD4 cell count is the backbone of immunity construction that helps the human body to protect from the disease and can prevent HIV replication ([45](#)). As patients' immune status becomes compromised, the rate of viral replication increase and the chance of acquiring opportunistic infections is high which leads to advanced stage of the disease. Consequently, the patient gives more emphasis to the current problem than the chronic HIV, stop taking drugs and interrupt follow-up which cause HIV treatment failure.

Poor HAART adherence found to have a great impact on the occurrence of HIV treatment failure. It is widely agreed that once treatment is initiated, it should not be interrupted. In Ethiopia, within 7 days, nearly 11.3% of children have poorly adhered to ART ([46](#)). It is expected that as duration increased, the probability of ART interruptions would be more likely. Similarly, in adult HIV patients', treatment interruption is fall in the range between 11.8-25.8% ([47](#), [48](#)). Acquired HIV drug resistance develops when HIV mutations emerge due to viral replication in individuals on an imperfect ART adherence. Poor ART adherence could lead to incomplete viral suppression and causes HIV treatment failure. Global recommendation like on-time pill pick-up, electronic or paper-based appointment scheduling, SMS or telephone call reminders, peer counseling, cognitive behavioral therapy, and reduction of the HIV-associated stigma that prevent missing of ART drugs are not well implementing in Ethiopia.

The current finding will have healthcare policy and clinical implication for therapeutic management decisions. Early identification of ART treatment failure allows patients a higher chance of treatment success when switching to a second line ART. The current

evidence will also be used to monitor the progress of the national action plan of 90-90-90 strategies.

## **LIMITATION OF THE STUDY**

Lack of studies in some geographical areas of Ethiopia makes the finding to be interpreted with caution. Besides, since the study design of included studies are observational (cross-sectional and cohort), establishing causal relationship between studied variables required caution.

## **CONCLUSION AND FUTURE DIRECTIONS**

To conclude, HIV treatment failure in Ethiopia found to be high. This review revealed HIV treatment failure is attributed to behavioral, clinical, and drug-related factors. HIV intervention programs need to be addressed the specified contributing factors of HIV treatment failure. Behavioral intervention to prevent treatment interruption is required to sustain HIV treatment adherence.

**Disclaimer:** This study is based on data from primary studies. The analysis, discussions, conclusions, opinions and statements expressed in this text are those of the authors.

**Funding:** There was no fund to conduct this systematic review and meta-analysis

### **Compliance with Ethical Standards**

**Conflict of interest:** Author AE declares that he has no conflict of interest. Author MM declares that he has no conflict of interest. Author DD declares that he has no conflict of interest. Author FA declares that he has no conflict of interest. Author HT declares



that he has no conflict of interest. Author TDH declares that he has no conflict of interest.

**Ethical approval:** This article does not contain any studies with human participants or animals performed by any of the authors because it relies on primary studies.

**Informed consent:** Not applicable

## REFERENCES

1. Quinn TC. HIV epidemiology and the effects of antiviral therapy on long-term consequences. *AIDS (London, England)*. 2008;22(Suppl 3):S7.
2. Hull MW, Montaner JS. HIV treatment as prevention: the key to an AIDS-free generation. *Journal of food and drug analysis*. 2013;21(4):S95-S101.
3. Granich R, Crowley S, Vitoria M, Smyth C, Kahn JG, Bennett R, et al. Highly active antiretroviral treatment as prevention of HIV transmission: review of scientific evidence and update. *Current Opinion in HIV and AIDS*. 2010;5(4):298.
4. World Health Organization. Consolidated guidelines on the use of antiretroviral drugs for treating and preventing HIV infection. Geneva, Switzerland: 2013.
5. Sidibé M, Loures L, Samb B. The UNAIDS 90–90–90 target: a clear choice for ending AIDS and for sustainable health and development. *Journal of the International AIDS Society*. 2016;19(1):21133.
6. Levi J, Raymond A, Pozniak A, Vernazza P, Kohler P, Hill A. Can the UNAIDS 90-90-90 target be achieved? A systematic analysis of national HIV treatment cascades. *BMJ Global Health*. 2016;1(2):e000010.

7. Nachega JB, Adetokunboh O, Uthman OA, Knowlton AW, Altice FL, Schechter M, et al. Community-based interventions to improve and sustain antiretroviral therapy adherence, retention in HIV care and clinical outcomes in low-and middle-income countries for achieving the UNAIDS 90-90-90 targets. *Current HIV/AIDS Reports*. 2016;13(5):241-55.
8. Organization WH. ART failure and strategies for switching ART regimens in the WHO European Region: report of the WHO expert consultation, Copenhagen, 7 December 2007. 2008.
9. Beisel WR. Nutrition and immune function: overview. *The Journal of nutrition*. 1996;126(suppl\_10):2611S-5S.
10. Haddad L, Gillespie S. Effective food and nutrition policy responses to HIV/AIDS: what we know and what we need to know. *Journal of International Development: The Journal of the Development Studies Association*. 2001;13(4):487-511.
11. Agu KA, Oparah AC, Ochei UM. Knowledge and attitudes of HIV-infected patients on antiretroviral therapy regarding adverse drug reactions (ADRs) in selected hospitals in Nigeria. *Perspectives in clinical research*. 2012;3(3):95.
12. Zoungrana J et al. Prevalence and Factors Associated with Treatment Failure during Antiretroviral Therapy Atbobo-Dioulasso University Teaching Hospital (Burkina Faso) (2008-2013). *Austin J HIV/AIDS Res* 2016;3(2).
13. Owusu M, Mensah E, Enimil A, Mutocheluh M. PREVALENCE AND RISK FACTORS OF VIROLOGICAL FAILURE AMONG CHILDREN ON ANTIRETROVIRAL THERAPY. *BMJ Global Health*. 2017;2(Suppl 2):A9-A.

14. Hawkins C, Ulenga N, Liu E, Aboud S, Mugusi F, Chalamilla G, et al. HIV virological failure and drug resistance in a cohort of Tanzanian HIV-infected adults. *Journal of Antimicrobial Chemotherapy*. 2016;71(7):1966-74.
15. Liberati A, Altman DG, Tetzlaff J, Mulrow C, Gøtzsche PC, Ioannidis JP, et al. The PRISMA statement for reporting systematic reviews and meta-analyses of studies that evaluate health care interventions: explanation and elaboration. *PLoS medicine*. 2009;6(7):e1000100.
16. Wells GA, Shea, B., O'Connell, D., Peterson, J., Welch, V., et al.,. The Newcastle-Ottawa Scale (NOS) for assessing the quality of nonrandomized studies in meta-analysis 2011.
17. Bokretzion GB, Endalkachew N, Getachew KA. HIV/AIDS treatment failure and its determinant factors among first line HAART patients at Felege-Hiwot Referral Hospital, Bahir Dar, Northwest Ethiopia. *Journal of AIDS and Clinical Research*. 2017;8(11).
18. Zeleke A. Prevalence of antiretroviral treatment failure and associated factors in HIV infected children on antiretroviral therapy at Gondar University Hospital, retrospective cohort study. *International Journal of Medicine and Medical Sciences*. 2016;8(11):125-32.
19. Ayalew MB, Kumilachew D, Belay A, Getu S, Teju D, Endale D, et al. First-line antiretroviral treatment failure and associated factors in HIV patients at the University of Gondar Teaching Hospital, Gondar, Northwest Ethiopia. *HIV/AIDS (Auckland, NZ)*. 2016;8:141.

20. Sisay MM, Ayele TA, Gelaw YA, Tsegaye AT, Gelaye KA, Melak MF. Incidence and risk factors of first-line antiretroviral treatment failure among human immunodeficiency virus-infected children in Amhara regional state, Ethiopia: a retrospective follow-up study. *BMJ open*. 2018;8(4):e019181.
21. Tsegaye AT, Wubshet M, Awoke T, Alene KA. Predictors of treatment failure on second-line antiretroviral therapy among adults in northwest Ethiopia: a multicentre retrospective follow-up study. *BMJ open*. 2016;6(12):e012537.
22. Yayehirad AM, Mamo WT, Gizachew AT, Tadesse AA. Rate of immunological failure and its predictors among patients on highly active antiretroviral therapy at Debremarkos hospital, Northwest Ethiopia: a retrospective follow up study. *Journal of AIDS and Clinical Research*. 2013;4(5).
23. Babo YD, Alemie GA, Fentaye FW. Predictors of first-line antiretroviral therapy failure amongst HIV-infected adult clients at Woldia Hospital, Northeast Ethiopia. *PloS one*. 2017;12(11):e0187694.
24. Bayu B, Tariku A, Bulti AB, Habitu YA, Derso T, Teshome DF. Determinants of virological failure among patients on highly active antiretroviral therapy in University of Gondar Referral Hospital, Northwest Ethiopia: a case-control study. *HIV/AIDS (Auckland, NZ)*. 2017;9:153-9.
25. Teshome W, Assefa A. Predictors of immunological failure of antiretroviral therapy among HIV infected patients in Ethiopia: a matched case-control study. *PLoS One*. 2014;9(12):e115125.

26. Yimer YT, Yalew AW. Magnitude and predictors of anti-retroviral treatment (ART) failure in private health facilities in Addis Ababa, Ethiopia. *PLoS One*. 2015;10(5):e0126026.
27. Bacha T, Tilahun B, Worku A. Predictors of treatment failure and time to detection and switching in HIV-infected Ethiopian children receiving first line anti-retroviral therapy. *BMC infectious diseases*. 2012;12(1):197.
28. Sisay C, Bekele A, Sisay A, Mekonen H, Terfa K. Incidence and Predictors of Anti-Retroviral Treatment (ART) Failure among Adults Receiving HIV Care at Zewditu Memorial Hospital, Addis Ababa, Ethiopia. *J AIDS Clin Res*. 2017;8(749):2.
29. Getnet Y. Determinants of First Line Antiretroviral Treatment Failure in Public Hospitals of Addis Ababa, Ethiopia: Unmatched Case Control Study. *Journal of Biology, Agriculture and Healthcare*. 2014;4(224-3208):1-12.
30. Yassin S, Gebretekle GB. Magnitude and predictors of antiretroviral treatment failure among HIV-infected children in Fiche and Kuyu hospitals, Oromia region, Ethiopia: a retrospective cohort study. *Pharmacology research & perspectives*. 2017;5(1):e00296.
31. Abdissa A, Yilma D, Fonager J, Audelin AM, Christensen LH, Olsen MF, et al. Drug resistance in HIV patients with virological failure or slow virological response to antiretroviral therapy in Ethiopia. *BMC infectious diseases*. 2014;14(1):181.
32. Workneh N, Girma T, Woldie M. Immunologic and clinical outcomes of children on HAART: a Retrospective cohort analysis at Jimma University specialized hospital. *Ethiopian Journal of Health Sciences*. 2009;19(2).

33. Hailu GG, Hagos DG, Hagos AK, Wasihun AG, Dejene TA. Virological and immunological failure of HAART and associated risk factors among adults and adolescents in the Tigray region of Northern Ethiopia. *PloS one*. 2018;13(5):e0196259.
34. Tadesse BT, Foster BA, Jerene D, Ruff A. Cohort profile: improving treatment of HIV-infected Ethiopian children through better detection of treatment failure in southern Ethiopia. *BMJ open*. 2017;7(2):e013528.
35. Deribew A, Biadgilign S, Berhanu D, Defar A, Deribe K, Tekle E, et al. Capacity of health facilities for diagnosis and treatment of HIV/AIDS in Ethiopia. *BMC health services research*. 2018;18(1):535.
36. Nash D, Tymejczyk O, Gadisa T, Kulkarni SG, Hoffman S, Yigzaw M, et al. Factors associated with initiation of antiretroviral therapy in the advanced stages of HIV infection in six Ethiopian HIV clinics, 2012 to 2013. *Journal of the International AIDS Society*. 2016;19(1):20637.
37. Haileamlak A, Hagos T, Abebe W, Abraham L, Asefa H, Teklu AM. Predictors of Hospitalization among Children on ART in Ethiopia: a Cohort study. *Ethiopian journal of health sciences*. 2017;27(1):53-62.
38. Gebremichael DY, Hadush KT, Kebede EM, Zegeye RT. Food Insecurity, Nutritional Status, and Factors Associated with Malnutrition among People Living with HIV/AIDS Attending Antiretroviral Therapy at Public Health Facilities in West Shewa Zone, Central Ethiopia. *BioMed research international*. 2018;2018.
39. Abdissa S, Fekade D, Feleke Y, Seboxa T, Diro E. Adverse drug reactions associated with antiretroviral treatment among adult Ethiopian patients in a tertiary hospital. *Ethiopian medical journal*. 2012;50(2):107-13.

40. Selamawit Z, Nurilign A. Common mental disorder among HIV infected individuals at Comprehensive HIV Care and Treatment Clinic of Debre Markos referral Hospital, Ethiopia. *Journal of AIDS and Clinical Research*. 2015;6(2).
41. Amare T, Getinet W, Shumet S, Asrat B. Prevalence and Associated Factors of Depression among PLHIV in Ethiopia: Systematic Review and Meta-Analysis, 2017. *AIDS research and treatment*. 2018;2018.
42. Westley BP, DeLong AK, Tray CS, Sophearin D, Dufort EM, Nerrienet E, et al. Prediction of treatment failure using 2010 World Health Organization Guidelines is associated with high misclassification rates and drug resistance among HIV-infected Cambodian children. *Clinical Infectious Diseases*. 2012;55(3):432-40.
43. Khienprasit N, Chaiwarith R, Sirisanthana T, Supparatpinyo K. Incidence and risk factors of antiretroviral treatment failure in treatment-naïve HIV-infected patients at Chiang Mai University Hospital, Thailand. *AIDS research and therapy*. 2011;8(1):42.
44. Soria A, Porten K, Fampou-Toundji J, Galli L, Mougnotou R, Buard V, et al. Resistance profiles after different periods of exposure to a first-line antiretroviral regimen in a Cameroonian cohort of HIV type-1-infected patients. *Antiviral therapy*. 2009.
45. Okoye AA, Picker LJ. CD 4+ T-cell depletion in HIV infection: mechanisms of immunological failure. *Immunological reviews*. 2013;254(1):54-64.
46. Endalamaw A, Tezera N, Eshetie S, Ambachew S, Habtewold TD. Adherence to Highly Active Antiretroviral Therapy Among Children in Ethiopia: A Systematic Review and Meta-analysis. *AIDS and Behavior*. 2018:1-11.

47. Giday A, Shiferaw W. Factors affecting adherence of antiretroviral treatment among AIDS patients in an Ethiopian tertiary university teaching hospital. *Ethiopian medical journal*. 2010;48(3):187-94.

48. Markos E, Worku A, Davey G. Adherence to ART in PLWHA and Yirgalem Hospital, South Ethiopia. *Ethiopian Journal of Health Development*. 2008;22(2):174-9.
